# Supplementary material for: Does pain self-efficacy predict, moderate or mediate outcomes in people with chronic headache; an exploratory analysis of the CHESS trial
Source: PubMed Central journal article supplement (PMC11094916; doi:10.1186/s10194-024-01768-5), 2024-05-15
Supplement: 10194_2024_1768_MOESM1_ESM.pdf [file 10194_2024_1768_MOESM1_ESM.pdf]

# Does pain self-efficacy predict, moderate or mediate outcomes in people with chronic headache; an exploratory analysis of the CHES trial

Siew Wan Hee, Shilpa Patel, Harbdiner Sandhu, Manjit S. Matharu and Martin Underwood on behalf of the CHES Team

## Appendix 1 Chronic migraine sub-group analysis

Table A1.1 Demographics and characteristics at baseline.

| Characteristics                                                                                        | Treatment arms          |                                   |                     |
|--------------------------------------------------------------------------------------------------------|-------------------------|-----------------------------------|---------------------|
|                                                                                                        | Usual care<br>(N = 191) | CHES<br>intervention<br>(N = 205) | All<br>(N = 396)    |
| Age, years                                                                                             |                         |                                   |                     |
| N                                                                                                      | 191                     | 205                               | 396                 |
| Mean (SD)                                                                                              | 47.6 (13.9)             | 46.4 (14.8)                       | 47.0 (14.4)         |
| Median (IQR)                                                                                           | 49.0 (37.0 to 58.0)     | 48.0 (36.0 to 56.0)               | 49.0 (36.0 to 57.0) |
| Gender, N (%)                                                                                          |                         |                                   |                     |
| Male                                                                                                   | 31 (16.2)               | 30 (14.6)                         | 61 (15.4)           |
| Female                                                                                                 | 160 (83.8)              | 173 (84.4)                        | 333 (84.1)          |
| Missing                                                                                                | 0 (0.0)                 | 2 (1.0)                           | 2 (0.5)             |
| Medication overuse headache, N (%)                                                                     |                         |                                   |                     |
| Not medication overuse headache                                                                        | 69 (36.1)               | 74 (36.1)                         | 143 (36.1)          |
| Medication overuse headache                                                                            | 122 (63.9)              | 131 (63.9)                        | 253 (63.9)          |
| Number of days pain killers were used as acute medications for headache/migraine over the last 4 weeks |                         |                                   |                     |
| N                                                                                                      | 187                     | 201                               | 388                 |
| Mean (SD)                                                                                              | 12.9 (6.8)              | 13.1 (7.6)                        | 13.0 (7.2)          |
| Median (IQR)                                                                                           | 12.0 (9.0 to 16.0)      | 14.0 (7.0 to 18.0)                | 12.0 (8.0 to 18.0)  |
| Missing                                                                                                | 4                       | 4                                 | 8                   |
| HIT-6 (range, 36 to 78; higher is worse)                                                               |                         |                                   |                     |
| N                                                                                                      | 190                     | 203                               | 393                 |
| Mean (SD)                                                                                              | 66.5 (4.9)              | 65.8 (4.9)                        | 66.1 (4.9)          |
| Median (IQR)                                                                                           | 66.0 (63.0 to 70.0)     | 66.0 (63.0 to 69.0)               | 66.0 (63.0 to 69.0) |
| Missing                                                                                                | 1                       | 2                                 | 3                   |
| PSEQ (range, 0 to 60; higher better)                                                                   |                         |                                   |                     |
| N                                                                                                      | 190                     | 202                               | 392                 |
| Mean (SD)                                                                                              | 29.6 (13.4)             | 30.3 (13.8)                       | 30.0 (13.6)         |
| Median (IQR)                                                                                           | 30.0 (19.0 to 39.8)     | 31.0 (21.0 to 39.8)               | 30.0 (20.0 to 40.0) |
| Missing                                                                                                | 1                       | 3                                 | 4                   |
| CH-QLQ Role Restrictive (range, 0 to 100; higher better)                                               |                         |                                   |                     |
| N                                                                                                      | 191                     | 203                               | 394                 |
| Mean (SD)                                                                                              | 49.6 (16.3)             | 49.7 (16.6)                       | 49.7 (16.4)         |
| Median (IQR)                                                                                           | 50.0 (38.1 to 61.9)     | 52.4 (36.9 to 59.5)               | 50.0 (38.1 to 61.3) |
| Missing                                                                                                | 0                       | 2                                 | 2                   |

| Characteristics                                            | Treatment arms          |                                   |                     |
|------------------------------------------------------------|-------------------------|-----------------------------------|---------------------|
|                                                            | Usual care<br>(N = 191) | CHES<br>intervention<br>(N = 205) | All<br>(N = 396)    |
| CH-QLQ Role Preventive (range, 0 to 100; higher better)    |                         |                                   |                     |
| N                                                          | 191                     | 203                               | 394                 |
| Mean (SD)                                                  | 63.1 (21.5)             | 64.8 (20.8)                       | 63.9 (21.2)         |
| Median (IQR)                                               | 66.7 (45.8 to 79.2)     | 66.7 (50.0 to 79.2)               | 66.7 (50.0 to 79.2) |
| Missing                                                    | 0                       | 2                                 | 2                   |
| CH-QLQ Emotional Function (range, 0 to 100; higher better) |                         |                                   |                     |
| N                                                          | 191                     | 202                               | 393                 |
| Mean (SD)                                                  | 52.3 (22.3)             | 51.5 (21.3)                       | 51.9 (21.8)         |
| Median (IQR)                                               | 50.0 (33.3 to 72.2)     | 50.0 (33.3 to 70.8)               | 50.0 (33.3 to 72.2) |
| Missing                                                    | 0                       | 3                                 | 3                   |

Abbreviations: SD, standard deviation; IQR, interquartile range, from 25<sup>th</sup> to 75<sup>th</sup> percentiles; HIT-6, Headache Specific Information; PSEQ, Pain Self-Efficacy Questionnaire; CH-QLQ, Chronic Headache Quality of Life Questionnaire.

Table A1.2 Estimated effect and its corresponding 95% confidence interval (CI) for predictor, moderator and mediator analyses for change of Headache Specific Information (HIT-6), Chronic Headache Quality of Life Questionnaire (CH-QLQ) Role Restrictive, CH-QLQ Role Preventive and CH-QLQ Emotional Function from baseline to 4-, 8- and 12-month. The mediator is the change of Pain Self-Efficacy Questionnaire (PSEQ) from baseline to 4-month (\*). Treatment usual care is the reference value and positive change indicates improvement.

| Descriptions                    | Model/covariates                                   | Estimated value (95% CI)                    |                                                             |                                                                   |                                                               |
|---------------------------------|----------------------------------------------------|---------------------------------------------|-------------------------------------------------------------|-------------------------------------------------------------------|---------------------------------------------------------------|
|                                 |                                                    | HIT-6<br>(range, 36 to 78; higher is worse) | CH-QLQ Role Restrictive<br>(range, 0 to 100; higher better) | CH-QLQ Role Preventive effect<br>(range, 0 to 100; higher better) | CH-QLQ Emotional Function<br>(range, 0 to 100; higher better) |
| Change from baseline to 4-month |                                                    |                                             |                                                             |                                                                   |                                                               |
|                                 | <b>Predictors</b>                                  |                                             |                                                             |                                                                   |                                                               |
|                                 | Treatment                                          | 0.892 (-0.288 to 2.071)                     | 1.794 (-2.232 to 5.821)                                     | 1.397 (-2.542 to 5.336)                                           | 2.651 (-2.127 to 7.429)                                       |
|                                 | PSEQ at baseline                                   | 0.029 (-0.015 to 0.074)                     | -0.043 (-0.194 to 0.108)                                    | -0.136 (-0.283 to 0.012)                                          | 0.006 (-0.173 to 0.185)                                       |
|                                 | <b>Moderators</b>                                  |                                             |                                                             |                                                                   |                                                               |
|                                 | Treatment                                          | 2.219 (-0.796 to 5.234)                     | -1.471 (-11.845 to 8.904)                                   | 3.112 (-7.044 to 13.269)                                          | -3.707 (-16 to 8.585)                                         |
|                                 | PSEQ at baseline                                   | 0.051 (-0.013 to 0.114)                     | -0.097 (-0.317 to 0.122)                                    | -0.107 (-0.322 to 0.108)                                          | -0.1 (-0.36 to 0.16)                                          |
|                                 | Treatment × PSEQ at baseline                       | -0.043 (-0.132 to 0.047)                    | 0.103 (-0.199 to 0.406)                                     | -0.054 (-0.351 to 0.242)                                          | 0.201 (-0.157 to 0.56)                                        |
| Change from baseline to 8-month |                                                    |                                             |                                                             |                                                                   |                                                               |
|                                 | <b>Predictors</b>                                  |                                             |                                                             |                                                                   |                                                               |
|                                 | Treatment                                          | -0.026 (-1.415 to 1.363)                    | 0.673 (-3.863 to 5.209)                                     | 0.754 (-3.543 to 5.05)                                            | 1.52 (-3.974 to 7.014)                                        |
|                                 | PSEQ at baseline                                   | 0.001 (-0.051 to 0.053)                     | -0.106 (-0.274 to 0.063)                                    | -0.166 (-0.325 to -0.006)                                         | -0.121 (-0.324 to 0.082)                                      |
|                                 | <b>Moderators</b>                                  |                                             |                                                             |                                                                   |                                                               |
|                                 | Treatment                                          | 0.960 (-2.568 to 4.487)                     | -0.599 (-12.143 to 10.944)                                  | 0.925 (-10.01 to 11.86)                                           | 2.718 (-11.243 to 16.679)                                     |
|                                 | PSEQ at baseline                                   | 0.017 (-0.057 to 0.092)                     | -0.128 (-0.379 to 0.123)                                    | -0.163 (-0.401 to 0.075)                                          | -0.1 (-0.404 to 0.204)                                        |
|                                 | Treatment × PSEQ at baseline                       | -0.032 (-0.135 to 0.072)                    | 0.041 (-0.298 to 0.379)                                     | -0.005 (-0.326 to 0.315)                                          | -0.038 (-0.448 to 0.371)                                      |
|                                 | <b>Mediator**</b>                                  |                                             |                                                             |                                                                   |                                                               |
|                                 | Direct treatment effect adjusted for mediator*, c' | -0.068 (-1.637 to 1.501)                    | -0.733 (-5.515 to 4.049)                                    | -0.943 (-5.509 to 3.623)                                          | 1.321 (-4.43 to 7.072)                                        |
|                                 | Mediated effect, ab                                | 0.199 (-0.0235 to 0.557)                    | 0.793 (-0.006 to 2.008)                                     | 0.746 (-0.009 to 1.899)                                           | 0.657 (-0.127 to 1.918)                                       |

| Descriptions                     | Model/covariates                                   | Estimated value (95% CI)                    |                                                             |                                                                   |                                                               |
|----------------------------------|----------------------------------------------------|---------------------------------------------|-------------------------------------------------------------|-------------------------------------------------------------------|---------------------------------------------------------------|
|                                  |                                                    | HIT-6<br>(range, 36 to 78; higher is worse) | CH-QLQ Role Restrictive<br>(range, 0 to 100; higher better) | CH-QLQ Role Preventive effect<br>(range, 0 to 100; higher better) | CH-QLQ Emotional Function<br>(range, 0 to 100; higher better) |
| Change from baseline to 12-month |                                                    |                                             |                                                             |                                                                   |                                                               |
| <b>Predictors</b>                |                                                    |                                             |                                                             |                                                                   |                                                               |
|                                  | Treatment                                          | 0.237 (-1.170 to 1.645)                     | 0.973 (-3.243 to 5.189)                                     | 2.998 (-1.612 to 7.607)                                           | 2.504 (-2.659 to 7.667)                                       |
|                                  | PSEQ at baseline                                   | -0.013 (-0.064 to 0.039)                    | -0.136 (-0.29 to 0.018)                                     | -0.175 (-0.344 to -0.007)                                         | -0.171 (-0.36 to 0.018)                                       |
| <b>Moderators</b>                |                                                    |                                             |                                                             |                                                                   |                                                               |
|                                  | Treatment                                          | 2.185 (-1.314 to 5.684)                     | 1.406 (-9.154 to 11.966)                                    | 5.109 (-6.432 to 16.65)                                           | 2.129 (-10.848 to 15.106)                                     |
|                                  | PSEQ at baseline                                   | 0.020 (-0.055 to 0.095)                     | -0.129 (-0.358 to 0.101)                                    | -0.138 (-0.389 to 0.113)                                          | -0.178 (-0.458 to 0.103)                                      |
|                                  | Treatment × PSEQ at baseline                       | -0.063 (-0.166 to 0.040)                    | -0.014 (-0.324 to 0.297)                                    | -0.068 (-0.407 to 0.272)                                          | 0.012 (-0.369 to 0.393)                                       |
| <b>Mediator**</b>                |                                                    |                                             |                                                             |                                                                   |                                                               |
|                                  | Direct treatment effect adjusted for mediator*, c' | 0.397 (-1.241 to 2.034)                     | 0.764 (-3.79 to 5.317)                                      | 2.501 (-2.627 to 7.628)                                           | 2.337 (-3.1 to 7.774)                                         |
|                                  | Mediated effect, <i>ab</i>                         | 0.316 (0.006 to 0.765)                      | 0.836 (0.009 to 2.052)                                      | 0.651 (-0.077 to 1.82)                                            | 1.316 (0.048 to 3.006)                                        |

\*\* The effect on the mediator (change of PSEQ from baseline to 4-month) from change of treatment, *a*, was 2.696 (0.116 to 5.275) for all outcomes from baseline to 8- and 12-month.

## Appendix 2 Chronic tension type headache plus episodic migraine sub-group analysis

Table A2.1 Demographics and characteristics at baseline.

| Characteristics                                                                                        | Treatment arms          |                                   |                     |
|--------------------------------------------------------------------------------------------------------|-------------------------|-----------------------------------|---------------------|
|                                                                                                        | Usual care<br>(N = 160) | CHES<br>intervention<br>(N = 171) | All<br>(N = 331)    |
| Age, years                                                                                             |                         |                                   |                     |
| N                                                                                                      | 160                     | 171                               | 331                 |
| Mean (SD)                                                                                              | 48.3 (16.2)             | 47.8 (15.1)                       | 48.1 (15.6)         |
| Median (IQR)                                                                                           | 48 (36.8 to 59.2)       | 50 (35.0 to 58.0)                 | 49 (36.0 to 59.0)   |
| Gender, N (%)                                                                                          |                         |                                   |                     |
| Male                                                                                                   | 31 (16.2%)              | 30 (14.6%)                        | 61 (15.4%)          |
| Female                                                                                                 | 160 (83.8%)             | 173 (84.4%)                       | 333 (84.1%)         |
| Missing                                                                                                | 0 (0.0%)                | 2 (1.0%)                          | 2 (0.5%)            |
| Medication overuse headache, N (%)                                                                     |                         |                                   |                     |
| Not medication overuse headache                                                                        | 69 (36.1%)              | 74 (36.1%)                        | 143 (36.1%)         |
| Medication overuse headache                                                                            | 122 (63.9%)             | 131 (63.9%)                       | 253 (63.9%)         |
| Number of days pain killers were used as acute medications for headache/migraine over the last 4 weeks |                         |                                   |                     |
| N                                                                                                      | 159                     | 170                               | 329                 |
| Mean (SD)                                                                                              | 11.8 (7.8)              | 11.8 (7.3)                        | 11.8 (7.5)          |
| Median (IQR)                                                                                           | 10 (6.0 to 16.0)        | 10.5 (6.0 to 15.0)                | 10 (6.0 to 16.0)    |
| Missing                                                                                                | 1                       | 1                                 | 2                   |
| HIT-6 (range, 36 to 78; higher is worse)                                                               |                         |                                   |                     |
| N                                                                                                      | 160                     | 171                               | 331                 |
| Mean (SD)                                                                                              | 62.3 (5.4)              | 62.8 (5.7)                        | 62.6 (5.5)          |
| Median (IQR)                                                                                           | 63 (59.0 to 66.0)       | 63 (60.0 to 66.0)                 | 63 (60.0 to 66.0)   |
| Missing                                                                                                | 0                       | 0                                 | 0                   |
| PSEQ (range, 0 to 60; higher better)                                                                   |                         |                                   |                     |
| N                                                                                                      | 158                     | 169                               | 327                 |
| Mean (SD)                                                                                              | 36.9 (12.1)             | 35.2 (13.2)                       | 36.0 (12.7)         |
| Median (IQR)                                                                                           | 37 (28.0 to 45.0)       | 36 (27.0 to 45.0)                 | 37 (27.0 to 45.0)   |
| Missing                                                                                                | 2                       | 2                                 | 4                   |
| CH-QLQ Role Restrictive (range, 0 to 100; higher better)                                               |                         |                                   |                     |
| N                                                                                                      | 160                     | 171                               | 331                 |
| Mean (SD)                                                                                              | 60.3 (16.7)             | 60.0 (15.6)                       | 60.1 (16.1)         |
| Median (IQR)                                                                                           | 61.9 (50.0 to 71.4)     | 61.9 (50.0 to 69.0)               | 61.9 (50.0 to 71.4) |
| Missing                                                                                                | 0                       | 0                                 | 0                   |
| CH-QLQ Role Preventive (range, 0 to 100; higher better)                                                |                         |                                   |                     |
| N                                                                                                      | 160                     | 171                               | 331                 |
| Mean (SD)                                                                                              | 77.0 (18.0)             | 75.0 (18.7)                       | 76.0 (18.4)         |
| Median (IQR)                                                                                           | 83.3 (66.7 to 91.7)     | 79.2 (62.5 to 91.7)               | 79.2 (66.7 to 91.7) |
| Missing                                                                                                | 0                       | 0                                 | 0                   |

| Characteristics                                            | Treatment arms          |                                   |                     |
|------------------------------------------------------------|-------------------------|-----------------------------------|---------------------|
|                                                            | Usual care<br>(N = 160) | CHES<br>intervention<br>(N = 171) | All<br>(N = 331)    |
| CH-QLQ Emotional Function (range, 0 to 100; higher better) |                         |                                   |                     |
| N                                                          | 160                     | 171                               | 331                 |
| Mean (SD)                                                  | 63.1 (20.9)             | 63.5 (21.9)                       | 63.3 (21.4)         |
| Median (IQR)                                               | 66.7 (50.0 to 83.3)     | 66.7 (44.4 to 83.3)               | 66.7 (47.2 to 83.3) |
| Missing                                                    | 0                       | 0                                 | 0                   |

Abbreviations: SD, standard deviation; IQR, interquartile range, from 25<sup>th</sup> to 75<sup>th</sup> percentiles; HIT-6, Headache Specific Information; PSEQ, Pain Self-Efficacy Questionnaire; CH-QLQ, Chronic Headache Quality of Life Questionnaire.

Table A2.2 Estimated effect and its corresponding 95% confidence interval (CI) for predictor, moderator and mediator analyses for change of Headache Specific Information (HIT-6), Chronic Headache Quality of Life Questionnaire (CH-QLQ) Role Restrictive, CH-QLQ Role Preventive and CH-QLQ Emotional Function from baseline to 4-, 8- and 12-month. The mediator is the change of Pain Self-Efficacy Questionnaire (PSEQ) from baseline to 4-month (\*). Treatment usual care is the reference value and positive change indicates improvement.

| Descriptions                    | Model/covariates                                   | Estimated value (95% CI)                    |                                                             |                                                                   |                                                               |
|---------------------------------|----------------------------------------------------|---------------------------------------------|-------------------------------------------------------------|-------------------------------------------------------------------|---------------------------------------------------------------|
|                                 |                                                    | HIT-6<br>(range, 36 to 78; higher is worse) | CH-QLQ Role Restrictive<br>(range, 0 to 100; higher better) | CH-QLQ Role Preventive effect<br>(range, 0 to 100; higher better) | CH-QLQ Emotional Function<br>(range, 0 to 100; higher better) |
| Change from baseline to 4-month |                                                    |                                             |                                                             |                                                                   |                                                               |
| <b>Predictors</b>               |                                                    |                                             |                                                             |                                                                   |                                                               |
|                                 | Treatment                                          | 0.719 (-0.933 to 2.371)                     | 0.414 (-3.185 to 4.013)                                     | 1.75 (-1.96 to 5.46)                                              | -0.939 (-5.588 to 3.71)                                       |
|                                 | PSEQ at baseline                                   | -0.021 (-0.086 to 0.043)                    | -0.149 (-0.294 to -0.004)                                   | -0.316 (-0.466 to -0.167)                                         | -0.202 (-0.389 to -0.014)                                     |
| <b>Moderators</b>               |                                                    |                                             |                                                             |                                                                   |                                                               |
|                                 | Treatment                                          | 6.653 (1.621 to 11.684)                     | 5.825 (-5.651 to 17.301)                                    | 4.159 (-7.692 to 16.009)                                          | 6.852 (-7.965 to 21.669)                                      |
|                                 | PSEQ at baseline                                   | 0.073 (-0.026 to 0.173)                     | -0.066 (-0.288 to 0.155)                                    | -0.279 (-0.508 to -0.051)                                         | -0.083 (-0.368 to 0.203)                                      |
|                                 | Treatment × PSEQ at baseline                       | -0.162 (-0.293 to -0.032)                   | -0.146 (-0.439 to 0.148)                                    | -0.065 (-0.367 to 0.238)                                          | -0.21 (-0.588 to 0.169)                                       |
| Change from baseline to 8-month |                                                    |                                             |                                                             |                                                                   |                                                               |
| <b>Predictors</b>               |                                                    |                                             |                                                             |                                                                   |                                                               |
|                                 | Treatment                                          | -0.321 (-1.803 to 1.161)                    | -1.717 (-5.507 to 2.073)                                    | 1.129 (-2.61 to 4.868)                                            | -3.629 (-8.298 to 1.04)                                       |
|                                 | PSEQ at baseline                                   | 0.043 (-0.015 to 0.101)                     | -0.109 (-0.259 to 0.041)                                    | -0.249 (-0.397 to -0.101)                                         | -0.267 (-0.451 to -0.082)                                     |
| <b>Moderators</b>               |                                                    |                                             |                                                             |                                                                   |                                                               |
|                                 | Treatment                                          | 1.760 (-2.869 to 6.388)                     | 1.102 (-10.971 to 13.175)                                   | 5.71 (-6.19 to 17.61)                                             | 13.941 (-0.744 to 28.626)                                     |
|                                 | PSEQ at baseline                                   | 0.075 (-0.014 to 0.164)                     | -0.066 (-0.296 to 0.164)                                    | -0.179 (-0.406 to 0.047)                                          | 0 (-0.28 to 0.28)                                             |
|                                 | Treatment × PSEQ at baseline                       | -0.056 (-0.173 to 0.062)                    | -0.075 (-0.379 to 0.229)                                    | -0.121 (-0.421 to 0.178)                                          | -0.466 (-0.835 to -0.096)                                     |
| <b>Mediator**</b>               |                                                    |                                             |                                                             |                                                                   |                                                               |
|                                 | Direct treatment effect adjusted for mediator*, c' | -0.517 (-2.056 to 1.021)                    | -2.21 (-5.993 to 1.572)                                     | 0.414 (-3.427 to 4.254)                                           | -3.593 (-8.425 to 1.239)                                      |
|                                 | Mediated effect, ab                                | 0.179 (-0.102 to 0.553)                     | 0.627 (-0.357 to 1.801)                                     | 0.64 (-0.365 to 1.837)                                            | 0.796 (-0.453 to 2.289)                                       |

| Descriptions                     | Model/covariates                                   | Estimated value (95% CI)                    |                                                             |                                                                   |                                                               |
|----------------------------------|----------------------------------------------------|---------------------------------------------|-------------------------------------------------------------|-------------------------------------------------------------------|---------------------------------------------------------------|
|                                  |                                                    | HIT-6<br>(range, 36 to 78; higher is worse) | CH-QLQ Role Restrictive<br>(range, 0 to 100; higher better) | CH-QLQ Role Preventive effect<br>(range, 0 to 100; higher better) | CH-QLQ Emotional Function<br>(range, 0 to 100; higher better) |
| Change from baseline to 12-month |                                                    |                                             |                                                             |                                                                   |                                                               |
| <b>Predictors</b>                |                                                    |                                             |                                                             |                                                                   |                                                               |
|                                  | Treatment                                          | -0.088 (-1.556 to 1.381)                    | -0.505 (-4.505 to 3.495)                                    | 1.863 (-2.128 to 5.854)                                           | -0.346 (-5.515 to 4.824)                                      |
|                                  | PSEQ at baseline                                   | 0.042 (-0.016 to 0.099)                     | -0.018 (-0.174 to 0.138)                                    | -0.267 (-0.423 to -0.111)                                         | -0.105 (-0.307 to 0.097)                                      |
| <b>Moderators</b>                |                                                    |                                             |                                                             |                                                                   |                                                               |
|                                  | Treatment                                          | 3.368 (-1.158 to 7.894)                     | -0.455 (-13.078 to 12.168)                                  | 5.331 (-7.254 to 17.917)                                          | 7.622 (-8.657 to 23.901)                                      |
|                                  | PSEQ at baseline                                   | 0.094 (0.008 to 0.180)                      | -0.017 (-0.26 to 0.225)                                     | -0.213 (-0.455 to 0.029)                                          | 0.019 (-0.294 to 0.332)                                       |
|                                  | Treatment × PSEQ at baseline                       | -0.093 (-0.208 to 0.022)                    | -0.001 (-0.319 to 0.316)                                    | -0.092 (-0.409 to 0.225)                                          | -0.212 (-0.621 to 0.198)                                      |
| <b>Mediator**</b>                |                                                    |                                             |                                                             |                                                                   |                                                               |
|                                  | Direct treatment effect adjusted for mediator*, c' | -1.018 (-2.587 to 0.551)                    | -2.458 (-6.333 to 1.417)                                    | 0.862 (-3.301 to 5.025)                                           | -1.828 (-7.107 to 3.452)                                      |
|                                  | Mediated effect, <i>ab</i>                         | 0.104 (-0.073 to 0.392)                     | 0.671 (-0.383 to 1.91)                                      | 0.711 (-0.405 to 2.029)                                           | 0.789 (-0.449 to 2.306)                                       |

\*\* The effect on the mediator (change of PSEQ from baseline to 4-month) from change of treatment, *a*, was 1.716 (-0.991 to 4.424) for all outcomes from baseline to 8- and 12-month.
